# Supplementary material for: Universal Differential Equations for glacier ice flow modelling
Source: Copernicus journal article supplement (doi:10.5194/gmd-2023-120), 2023-06-15
Supplement: Supplementary file [file gmd-2023-120-AC1-supplement.pdf]

# Review response for *Universal Differential Equations for glacier ice flow modelling*

The Authors

September 20, 2023

Dear Reviewer Douglas Brinkerhoff,

We thank you for your constructive comments and suggestions. Here we have elaborated on some of your points. Original *reviewer responses are in italic*, while the [authors responses can be found in blue](#).

*In this paper, the authors describe embedding a neural-network-based parameterization of the viscous rate factor within a shallow ice model and training it on a semi-synthetic dataset with the aid of reverse mode automatic differentiation. I think that this is generally an important topic and that this paper is a useful step in the direction of modelling/ML hybrids. I don't have many objections with respect to the technical content of this work, however I do think it suffers from a few significant misunderstandings of its own methods, of referenced works, and of the broader context into which these results fit. These issues, along with some more minor technical corrections, are outlined below.*

## 1. COMMENTS

L40 *It should be noted here that adjoints have been known about and used in glaciology since at least Doug Macayeal's 1993 paper on optimal control methods (MacAyeal, Douglas R. "A tutorial on the use of control methods in ice-sheet modeling." *Journal of Glaciology* 39.131 (1993): 91-98.). While utilizing neural networks to do things in glaciology is a bit new, the general notion of 'reverse mode AD' is not. (It would also be worth citing Tarasov (2012, "A data-calibrated distribution of deglacial chronologies for the North American ice complex from glaciological modeling." *Earth and Planetary Science Letters* 315 (2012): 30-40.) as an early example of NN surrogates in glaciology.*

We completely agree with this point. We believe we have attempted to address this point in L51, where we try to make the difference between what efforts have been made so far in terms of differentiable programming in glaciology with respect to this study. We have added the following sentence in that paragraph to add this context: "*Such gradients can be found by either computing the associated adjoint or by using AD.*". We are also grateful for the references.

L56–64 *I find this paragraph to be quite confusing on account of the use of ‘scalar parameters’. Many inversion techniques (including the Macayeal paper listed above) are built around finding spatially distributed parameter fields, which are not scalar. Indeed, different forms of regularization in such fields often correspond to a Gaussian process functional prior over spatial (and in some cases temporal) parameter fields. Furthermore, what does ‘reduced to the current structure of the mechanical model mean’? As a side note the reference to Brinkerhoff (2016) is questionable: that work uses no gradients but rather very basic MCMC to find distributions over parameter values. However, there are many other good examples of differentiable ice flow models.*

We agree that this concept is not easy to communicate, and it might require some improvements in the way we are writing it. What we mean by this, is the fact that in what we call ”scalar inversions” the structure of the model (i.e. the equation itself) is not modified. In this type of inversions, parameters already present in the equation are fitted. However, for the case of functional inversions, we are actually inverting a function, which can then be translated into a mathematical expression, thus expanding the already existing equation. This implies that such inversions ”build” on top of already existing models, expanding them by adding new parts to them. In order to convey this point, we have restructured this paragraph in the following way:

*”Nonetheless, all efforts so far have been applied to the inversion of scalar parameters and sometimes their distributions, i.e. parameters that are stationary for a single inversion given a dataset. This means that the potential of learning the underlying physical processes is reduced to the current structure of the mechanistic model. No changes are made to the equations themselves, with the main role of the inversions being the fitting of one or more parameters already present in the equations. To advance beyond scalar parameter inversions, more complex inversions are required, shifting towards functional inversions. Functional inversions enable the capture of relationships between a parameter of interest and other proxy variables, resulting in a function that can serve as a law or parametrization. These learnt functions can then be added in the currently existing equation, thus expanding the underlying model with new knowledge.”*

L67 *I think it’s perhaps a bit of a stretch to say that the neural networks in this work learn ‘spatiotemporal variability’. What they are learning is a parameterization of ice softness as a function of surface temperature based on a number of training examples that happen (or are designed) to span a practical domain and range of said function.*

Agreed, but we believe it is a good way to convey the fact that any empirical law will ultimately depend on some proxies, which in the context of the geosciences, vary in the temporal and spatial dimensions. Of course the dependency is not on space itself, but in this case the climate does depend on space (and also time). So actually, what the

NN is learning is the **spatial** variability (i.e. between glaciers) of  $A$ . It is also capturing a temporal variability, but since the climate is computed with a 30 year rolling mean, the changes are almost imperceptible.

L84 *I think it's too early to talk about assuming that  $C = 0$  here: the equation remains a "diffusion" equation regardless of this choice and it is not necessary in order to be able to define a  $D$ .*

We agree that the equation is a diffusivity equation independently of the assumption  $C = 0$ . We have now introduced the title of *diffusivity equation* before the assumption  $C = 0$ , but we believe this simplification is useful to introduce the more compact form of the SIA equation we use for this application.

L99 'propriety'  $\rightarrow$  'property'

Noted.

Eq. 4 *I suggest using  $u$  or some other symbolic choice to make clear that velocity is a vector (rather than  $V$ ).*

Thanks for the suggestion. We have changed the notation to  $u$ .

Sec. 2.2 *I think that this section needs to be moved after 2.3, since it is not yet clear what the embedded neural net is supposed to be representing in this case. Furthermore, the function  $SIA_{\text{Solver}}$  is never defined. Does this yield a thickness or a velocity? Since ice velocities are prognostic, why should this function take  $V_0$  as an argument, when there cannot be any dependency on this argument? Should this be an  $H_0$ ?*

We chose to present the concept of UDEs before presenting the actual functional inversion we use in this study in order to first understand the global concept before introduce an example of it. The way we present UDEs, and  $D_\theta$  is independent from what that function is actually parametrising. First we introduce the big idea, and then in section 2.3 we introduce an application of this idea.

We have added a definition for  $SIA_{\text{Solver}}$ .  $SIA_{\text{Solver}}$  yields a thickness, but then by performing a simple transformation we can obtain the surface velocities, as explained in Equation 4. We have clarified all this in the following manner: "*For a single glacier, if we observed two different ice surface velocities  $u_0$  and  $u_1$  at times  $t_0$  and  $t_1$ , respectively, then we want to find  $\theta$  that minimizes the discrepancy between  $u_1$  and  $SIA_{\text{Solver}}(H_0, t_0, t_1, D_\theta)$ , defined as the forward numerical solution of the SIA equation yielding a surface ice velocity field following Equation 4*"

Regarding  $u_0$ , indeed, this should be  $H_0$ , since this is what is used by SIASolver as initial conditions. We have updated this accordingly.

Sec. 2.2 *I really struggle with casting this problem as one that is time dependent and I am not sure I see the value in doing so in this work. The reason for this is that the inversion targets are velocities, which are diagnostic of thickness. Since thickness at some time is being considered as known, then one can simply compute the velocity at this time and use it in computing a loss, updating the parameters of the embedded neural network parameterization of hardness, etc. There is simply no need for a time dependent solver in the procedure as written (although, to be sure there is utility to time-dependent adjoints of glacier models). I think that the consequences of this independence are readily apparent in the authors results in the sense that they find no trouble in recovering their chosen ice hardness parameterization even with mis-specified surface mass balance rates: the reason for this is that the mass balance doesn't really affect the velocity and thus doesn't affect the recovered parameterization. I think that the authors allude to this themselves around L324, but I would like to see some more robust justification for why all of the fancy stuff is necessary here. Finally, as a suggestion for an augmentation that might make all of this a little bit more compelling, is it possible to do all of this with thickness as the predicted value rather than velocity?*

This is a very good point. We tried to argue about these aspects in section 4.1 and in the discussion (L326-330). Regarding the use of V against H. Indeed, we have tried to use H as the target for the inversions, but this seems to work only when no surface mass balance is present. The mass balance alters the ice thickness, thus introducing too much noise for the model to correctly invert  $A$ . On the other hand, V is not sensitive to the surface mass balance, as we have shown in this study. Therefore, we believe V is a much better target data for inversions regarding ice rheology in the presence of a surface mass balance signal.

As we explained in L326-330, we do agree that this approach might seem quite overkill for the problem at hand. But again, like the use of a NN, this is to prove that this more complex setup can work with this more complex nonlinear PDEs. Nonetheless, some preliminary tests trying to solve this problem with a time-independent method (not shown in this study) showed that that sort of inversion is highly sensitive to noise. Small changes in the surface conditions (i.e. due to mass balance), made it quite hard for the inversion to easily converge. Since we believe the more complex approach with a time-dependent solver has more potential, both in terms of data assimilation in the presence of noise and for transient simulations, we decided to focus on this.

In order to clarify this, we have added the following sentence in the sub-section "Robustness to noise in observations": *"Various tests using H instead of u as the target*

*data showed that  $A$  cannot be successfully inverted in the presence of a surface mass balance signal.”*

L140 *I think that the phrase ‘spatial’ should be dropped here. This is trying to recover  $A(T_s)$ . One could imagine a circumstance in which  $T_s$  is a function of space internally to each training example, but it does not seem to be the case here (based on Fig. 3, although I could misunderstand this)*

As explained above, we do believe that predicting the relationship with respect to climate accounts for spatial dependencies. Here, the climate is calculated at each glacier’s centroid. This means that the climate signal changes through space (i.e. among glaciers). When referring to spatial dependencies, we are not referring to spatial changes **within** a glacier, but **among** glaciers (i.e. in their coordinates).

We have added this nuance in the text: *”The objective of  $A_\theta(T)$  will be to learn the spatial variability (i.e. among glaciers) of  $A$  with respect to  $T$  for multiple glaciers in different climates.”*

L144 *I think that this part is confusing: the authors write that their function for  $A$  ignores ice temperature, but isn’t that what the surface temperature is supposed to proxy? This section is generally a bit unclear and could benefit from improved notation. For example, I suggest using the symbol  $T_s$  for surface temperature, to make it clear that this is what is being fed into the parameterization.*

Indeed, it ignores ice temperature, since it’s not an input feature of the NN. We use surface air temperature as a proxy of ice temperature. As suggested, we have updated all instances of  $T$  to  $T_s$ . Moreover, we have rephrased this sentence to make this point clearer: *”This relationship is based on the hypothesis that  $T_s$  is a proxy of ice temperature, and therefore of  $A$ . However, it ignores many other important physical drivers influencing the value of  $A$ , such as a direct relationship with the temperature of ice, the type of fabric and the water content.”*

L162 *Why ‘timestamps’ and not just ‘times’?*

We agree that the word times here is more adequate.

Sec 3.1 *Typically model runs require some type of spinup because the physics and various data products are not all self-consistent, leading to unrealistically large transient behavior as all of these things equilibrate. Was that the case here? Does it influence the results?*

This is true. Nonetheless, for this case study we did not experience any initial shock in the simulations that we had to deal with. Both the used initial ice thickness and the transient simulation look quite smooth.

L176 *I know that the CFL is mentioned in Appendix A, but it would be worth summarizing the methods used to ensure time-stepping stability conditions are satisfied here.*

Thank you for the suggestion. We have added the following sentence explaining this in the manuscript based on the current implementation of the numerical solver: *"The method implements an adaptive temporal step size close to the maximum value satisfying the CFL conditions for numerical stability at the same time that controls numerical error and computational storage"*

177–180 *Why is noise applied to  $A$  rather than to the observed velocity? It's not  $A$  that is being observed, and thus it makes little sense to simulate noise in  $A$ .*

This is a good point. We could have directly added the noise in the surface velocity. However, in practical terms this accounts to almost the same. Perturbating  $A$  results in surface velocity perturbations, so the result is equivalent. Moreover, since what we want to learn is  $A$ , this also gives us insight on how close we can get to a noisy empirical law. At the end of the day, empirical laws are just a fitted function minimising the error. There is indeed a transformation from  $A$  to  $u$ , but we find it interesting to directly treat the  $A$  space, since it related more with the "fundamental" function we are trying to learn.

L181 *Most readers will not be able to infer what  $(1,3,10,3,1)$  means when describing neural networks. This either needs to be expanded here, or a discussion of neural network architecture choice should be added as an appendix.*

We agree with this point. We had added a more detailed explanation regarding the architecture without relying in the extra notation.

L182 *Once again, I think that some clarification of what is actually happening here is in order: the authors are using a very common formulation of a numerical ice flow model in a standard way. The novelty here is the replacement of a static rate factor  $A$  with a function  $A_\omega(Ts)$  that is parameterized via a function that happens to be quite flexible (a neural network). I don't think that this is semantically equivalent to saying the problem is highly constrained by the PDE nature of the ice flow model.*

I think our original point was not correctly communicated. What we intended to explain here is that this approach is simpler than a classic data-driven formulation of the problem, where the neural network would have to learn the whole dynamics of the problem directly from data, from a purely machine learning perspective. The fact that we use a numerical solver to solve a differential equation, and we leave just a small subset of the dynamics to the neural network, results in a much simpler learning problem, since we are imposing the optimization problem with the structure of the SIA. We have updated

the text by explicitly mentioning this:

*"Since the optimization problem is much more constrained by the structure of the solutions of the PDE compared to a pure data-driven approach, a very small neural network is enough to learn the dynamics related to the subpart of the equation it is representing (i.e.  $A$ )."*

L186 *Why is the final sigmoid necessary? What happens without it? I can understand the desire to impose positivity (which could perhaps more easily be effected by log-transforming  $A$ , as is commonly done), but why should there be an upper bound?*

This sigmoid output function with capped values is necessary for the NN to avoid producing  $A$  values that are too large. If an upper bound is not used, the NN can output large values (i.e. much larger than  $10^{-15}$ ), which when "injected" into the SIA produce numerical instabilities (because the minimum and maximum timestep in the solver may be also constrained) or makes the explicit solver to take smaller timesteps to ensure suitability, which then leads to more computationally expensive computation of the gradients. Moreover, this is part of the philosophy of introducing any possible physical constrain into the model. If we know *a priori* that the values of  $A$  have a given range, it makes sense to include this into the model.

In order to clarify this, we have added the following sentence: *Constraining the output values of the neural network is necessary in order to avoid numerical instabilities in the solver or very small stepsizes in the forward model than will lead to expensive computations of the gradient.*

L195–198 *I don't understand this section. Why does adding a source term in the ODE produce instability? What is the  $H$  matrix? Are you saying that you're adding the mass balance after the integration of the flow equations?*

The way the solvers in the DifferentialEquations.jl library are coded, imply that one can seamlessly change the solver used to solve a given differential equation. This means that the time stepping mechanisms are hidden under the hood to the user. For the solvers to work correctly, it is important not to add any substantial source during the computation of a time step, since it can interfere with the internals of each solver. We observed empirically the effect of numerical instabilities when adding the mass balance contribution at every step size in the solver. In order to add the contribution of mass balance to the ice thickness we decided instead to add it in discrete steps every month, which makes sense both computationally and numerically. For that, we used DiscreteCallback, which is especially designed to handle events during the solving of a differential equation. They get called when a given condition is met. E.g. for the mass balance, once a month of time has elapsed.



We have updated this sentence in order to clarify this and the reference to the "H matrix": *"In order to add the surface mass balance term  $b$  in the SIA Equation we used a `DiscreteCallback` from `DifferentialEquations.jl`. This enabled the modification of the glacier ice thickness  $H$  with any desired time intervals and without producing numerical instabilities."*

L199–205 *How long are these runs for? Is there sufficient geometric change over this time period to warrant such a detailed approach (and are the changes large enough to significantly affect  $A$ )? Shouldn't  $A$  respond over fairly long time scales, since it's ultimately ice temperature rather than surface temperature that controls flow?*

In this study, we mostly ran simulations for a period of 5 to 10 years. These periods are much shorter than the whole W5E5 or ERA5 period available in the raw file given by OGGM. Therefore, in terms of memory usage, it is much better to preprocess once the file, dropping unnecessary variables and cropping the needed time period, than doing so each time step (i.e. monthly) in the solver. This is not done only to drive changes in  $A$ . The main reason behind this is the computation of the surface mass balance, which needs a detailed evolution of the climate on the glacier. That is why the name of the sub-section is called "Surface mass balance".

Sec 3.4 *I think that this section is too deep with respect to AD to be of use to glaciologists reading this, while being too shallow to be of use to AD practitioners. I suggest either delving deeply into a software- engineering type study of the influence of different AD approaches or to cut this section and simply describe the approach that was actually used. This goes for Appendix B as well, which is mostly a textbook definition of finite differences and the adjoint method.*

We agree with the reviewer about the fact that here we are dealing with different audiences. Rather than targetting the glaciologists or general AD practitioners, here we focus on the set of practitioners working in the Scientific Machine learning ecosystem in Julia. There is a large amount of people currently attempting to use these tools for complex problems in geophysics. Focusing on these aspects is useful for other researchers working in different applications, as we have experienced in conversations with people in the community. As mentioned in the abstract, we believe this is one of the interesting bits of information that a lot of people who will read the paper will be looking for.

L254–255 *Referencing the potential broader impacts of cloud computing is fine, but a statement like this needs to be backed up with some evidence: it is not immediately obvious that the cloud improves scientific equity.*



We thank the reviewer for rising this point. Although we the authors have experienced the benefits of cloud computing in terms of scientific and pedagogical inclusivity, unfortunately there is no formal study assessing the validity of this statement. We hope to see work in this line in the future. We have then decided to remove this sentence from the manuscript.

Fig. 3 *This figure begs the question: why use a neural network for parameterizing  $A(T)$ . It is clear that a quadratic or exponential would have worked just as well. Indeed, if the authors had predicted the log of  $A$ , then it is likely that a linear model would have fit these data just as well as the NN. I appreciate the potential for generalization of the NN approach, but an ablation study with simpler models might be helpful here.*

This is indeed true. As you mentioned, the main reason behind to choice of a NN is its universality in terms of function representation plus their capacity of being easily differentiable with respect to their parameters. We purposely chose a simple case in order to evaluate the performance in a controlled environment. For any other real case scenario, any family of regression function with good expressively will serve well, but NN are particularly easy to train inside the SciML ecosystem in Julia. It is important to emphasize that NNs are easy to differentiate, compared to many other methods (e.g. including tree-based methods). These aspects are largely commented in Rackauckas et al. (2020).

L4.1 *Again, because velocity is diagnostic, this is not a surprising outcome.*

Agreed

L316 *There is a substantial literature on the joint inference of traction and rheological parameters (typically in a Bayesian framework which allows for a quantification of induced covariance between parameters). In summary, this inversion is not necessarily ill-posed ‘by nature’ because there is scale separation between different processes.*

Thanks for this comment. We have adjusted the text in order to nuance a bit more this message in the following way: *“Nonetheless, despite a scale difference between these two processes, this can be an ill-posed problem, since the only available ice velocity observations are from the surface, encompassing both creep and basal sliding.”*. Indeed, this is an interesting point to explore in future work, also to evaluate different methods that can do inference on these two different contributions to the diffusivity.

L324 *This description of the seasonal cycle of glacier velocities is perhaps oversimplified: many glaciers exhibit minimal velocities at the end of summer and speed up during the winter. Maybe reword to express a bit more nuance?*

Indeed, this is simplified. We don't want to get into details about these processes here. Nonetheless, for midlatitude temperate glaciers, this is the main trend. In fact, here we are not talking about velocities, we are just mentioning the main contributions of creep during winter, and the onset of sliding during summer (independently of the effects on surface velocity).

L329 *I don't understand the use of 'initial conditions' here. If we're not doing time evolution, then the conditions aren't really 'initial', they're just the geometry.*

Good point. We have updated this term to "geometry".

L335 *It would be nice to see some references that illustrate the so-called 'equifinality problem'.*

We have added two references covering this equifinality problem.

Sec. 5 *Throughout this work, the uncertainty in inferred parameters is not addressed. I think that there should at least be a discussion of the potential implications of such and avenues for providing a more rigorous uncertainty quantification.*

Indeed, uncertainty quantification is not addressed in this work. Although we recognize this is an important piece in geophysical models and that informing about the confidence we have in our estimates is useful, we decided to leave this point of discussion for future work. Notice than in this setup uncertainty quantification needs to be carried on the output of the NN, and it's not uncertainty on the parameters of the same. Therefore, this implies inferring the uncertainty of the learnt function.

Sec. 5.2.1 *This editorial on AD approaches is not relevant to the current work.*

This paper has two distinct target audiences: (1) Computational glaciologists interested in advanced techniques to make inversions to improve understanding of glacier physical processes; (2) Computer scientists and statisticians interested in Universal Differential Equations and the Julia ecosystem. This subsection is directly targeted to the second audience. It might seem out of topic for the glaciology community, but this information is highly relevant to Julia practitioners who are interested in using these methods for their own research.

L374 *The authors seem to have a misunderstanding of PINNs, which involve positing a neural network as the PDE solution and then using a point collocation method to adjust the solution so as to minimize the solution residual in some norm. As such, a PINN is not a surrogate, but rather is a numerical method for solving PDEs in the same vein as FEM or FD and does not require 'training data' in the way that it is usually understood in the ML literature. In contrast, the work of Jouvret (which is indeed a surrogate, but which does not employ PINNs in the described way) trains a CNN to operate as the*

*approximate solution operator to the ice flow equations from many examples of solutions generated by a ‘normal’ ice flow model (or perhaps by using a PINN).*

We thank the reviewer for this comment. We agree that the two concepts of using NN as numerical solver and emulators are explained in a rather confusing way in this section. The connection here with PINNs is confusing and we rather wanted to refer to the family of emulators that can be used to emulate a numerical solver for different initial condition and parameter choices. We have removed the reference to PINNs and keep the one to emulators.

Sec. 5.2.3 *I do not understand this section.*

We agree that this section it was difficult to read as it was presented. We have re-written this section to make our point more clear and understandable.

Eq. A9,A10 *I don’t understand the how these conditions related to step size choices. Is there another reference that might illustrate this point more clearly?*

This condition is not related to the choice of the stepsize. Instead, this condition is used to force the condition that the ice thickness cannot take negative values. We apologize for not including a further reference for this point. We have included the pertinent reference to the manuscript: *Imhof, M. A.: Combined climate-ice flow modelling of the Alpine ice field during the Last Glacial Maximum, VAW-Mitteilungen, 260, 2021*
